# Supplementary material
Source: PubMed Central journal article supplement (PMC4097191)
Supplement: NIHMS585283-supplement-Supplementary_Fig_2.pdf [file NIHMS585283-supplement-Supplementary_Fig_2.pdf]

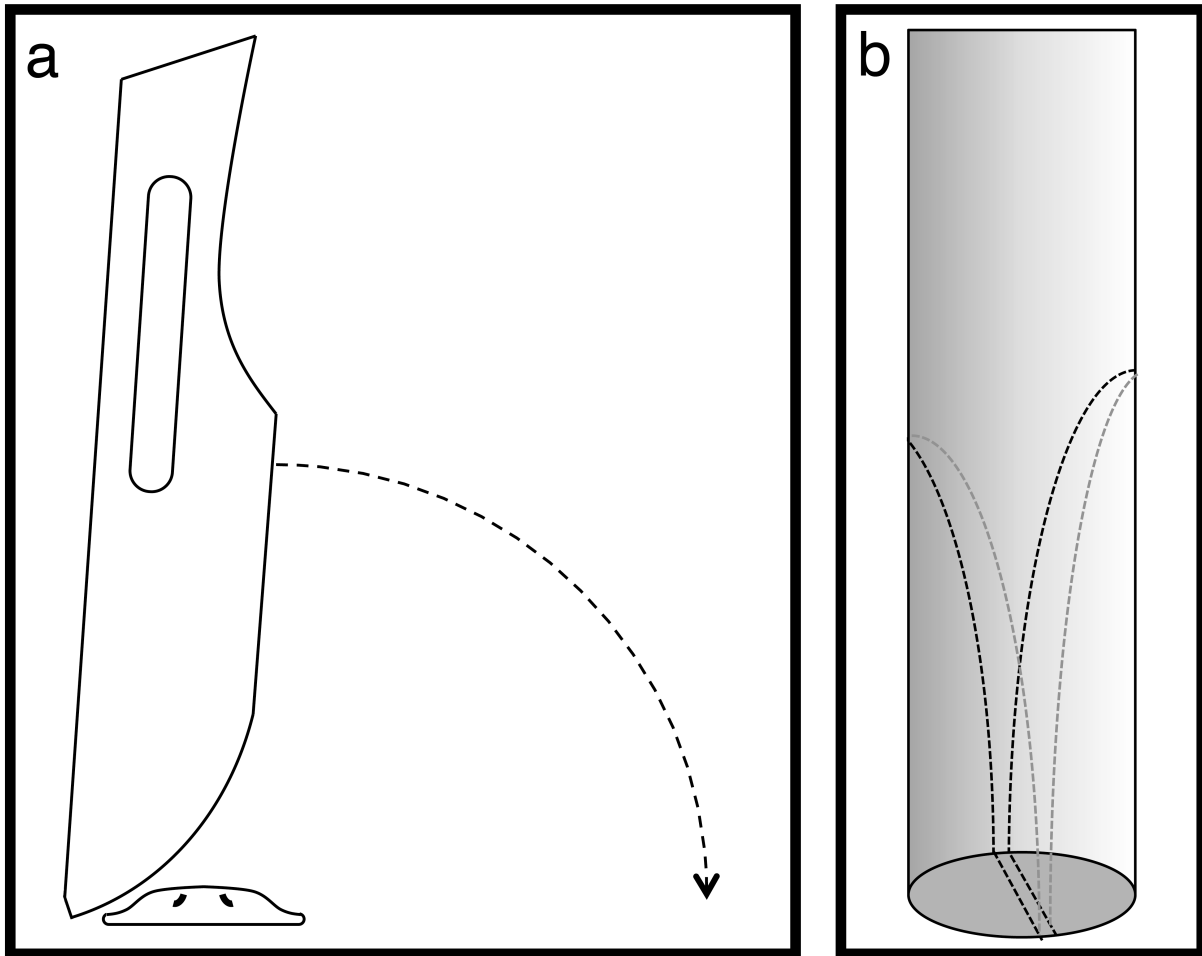

**Illustrations for steps 5 and 18.** (a) To minimize physical damage to worms in step 5, they should be cut after a brief initial fixation using a rocking “guillotine” motion using a scalpel with a rounded end. The rocking motion initiates cutting of tissue at the thinnest point of the worm’s body, and reduces compression by minimizing the diameter of the worm in contact with the blade at any time. (b) Drawing of one end of a wooden applicator stick. To produce a mini-spatula as described in step 18, carve one end of the stick into a thin, flat surface by whittling as indicated by the dashed lines in this image.
